# Supplementary material for: Dual-emission ratiometric fluorescent sensor based on tannic acid carbon dots and eosin for selective detection of paraquat in water and food samples
Source: Royal Society of Chemistry journal article supplement (doi:10.1039/d5ra07809a), 2025-01-01
Supplement: d5ra07809a1.pdf [file d5ra07809a1.pdf]

**Dual-Emission Ratiometric Fluorescent Sensor Based on Tannic Acid Carbon  
Dots and Eosin for Selective Detection of Paraquat in Water and Food  
Samples**

**Mohamed N. Goda<sup>a</sup>, Laila S. Alqarni<sup>a</sup>, K.S. Al-Namshah<sup>a</sup>, Faisal K. Algethami<sup>a</sup>, Hossieny  
Ibrahim<sup>b</sup>, Mohamed M. El-Wakil<sup>c</sup>, Al-Montaser Bellah H. Ali<sup>c\*</sup>**

<sup>a</sup> Department of Chemistry, College of Science, Imam Mohammad Ibn Saud Islamic University  
(IMSIU), Riyadh 11623, Saudi Arabia

<sup>b</sup> School of Biotechnology, Badr University in Assiut, Assiut 2014101, Egypt

<sup>c</sup> Department of Pharmaceutical Analytical Chemistry, Faculty of Pharmacy, Assiut University,  
Assiut, Egypt.

\*e-mail: Almontaser\_bellah@aun.edu.eg

## **2.2. Instrumentation and characterization**

The optical properties of the CDs were investigated using fluorescence and ultraviolet-visible (UV-Vis) spectroscopy. Fluorescence emission spectra were recorded using a Shimadzu RF-5301PC spectrofluorometer, with samples excited at 335 nm and 5 nm slit widths. Absorption spectra were recorded on a Shimadzu 1601 PC UV-Vis spectrophotometer. To elucidate the structural and morphological characteristics of the TA-CDs, several analytical techniques were employed. Transmission electron microscopy (TEM) was performed using a JEOL 2100F instrument at 200 kV accelerating voltage, providing insights into the size and shape of the nanoparticles. X-ray diffraction (XRD) patterns were collected using a Philips PW 1700 diffractometer to assess the crystalline structure. Fourier transform infrared (FTIR) spectroscopy was conducted on KBr pellets using a Nicolet 6700 spectrometer, revealing information about functional groups present on the CDs' surface. Surface chemical composition and bonding states were analyzed through X-ray photoelectron spectroscopy (XPS) using a Thermo Scientific ESCALAB250 spectrometer. This comprehensive suite of characterization techniques provided a detailed understanding of the optical, structural, and chemical properties of the CDs, enabling a thorough evaluation of their potential for sensing applications.

## **2.4. Quantum yield of the prepared TA-CDs**

The quantum yield (QY) of the CDs was determined using quinine sulfate (QS) as a reference standard. The calculation was performed according to the following methodology: quinine sulfate, dissolved in 0.1 M  $\text{H}_2\text{SO}_4$ , served as the reference fluorophore with a known quantum yield of 54%. Both the CDs and QS solutions were prepared at concentrations that yielded absorbance values below 0.05 to minimize inner filter effects and ensure linearity of the fluorescence response. The absorbance and emission spectra of the CDs and QS were measured at an excitation

wavelength of 360 nm. The integrated fluorescence intensities and absorbance values were then used in the following equation to calculate the quantum yield of the CDs:

$$\phi_{CDs} = \phi_{QS} \times \frac{F_{CDs}}{F_{QS}} \times \frac{A_{QS}}{A_{CDs}} \times \frac{\eta_{CDs}}{\eta_{QS}}$$

In this context,  $\Phi_{CDs}$  denotes the quantum yield of the CDs, while  $\phi_{QS}$  represents the quantum yield of quinine sulfate (QS).  $F_{CDs}$  and  $F_{QS}$  correspond to the fluorescence intensities of the CDs and quinine sulfate, respectively. The term A refers to the absorbance value and  $\eta$  indicates the refractive index of the solvent. For this experiment, the CDs were dissolved in distilled water with a refractive index of  $\eta = 1.33$ , and quinine sulfate was dissolved in 0.1 M  $H_2SO_4$ , also with a refractive index of  $\eta = 1.33$ .

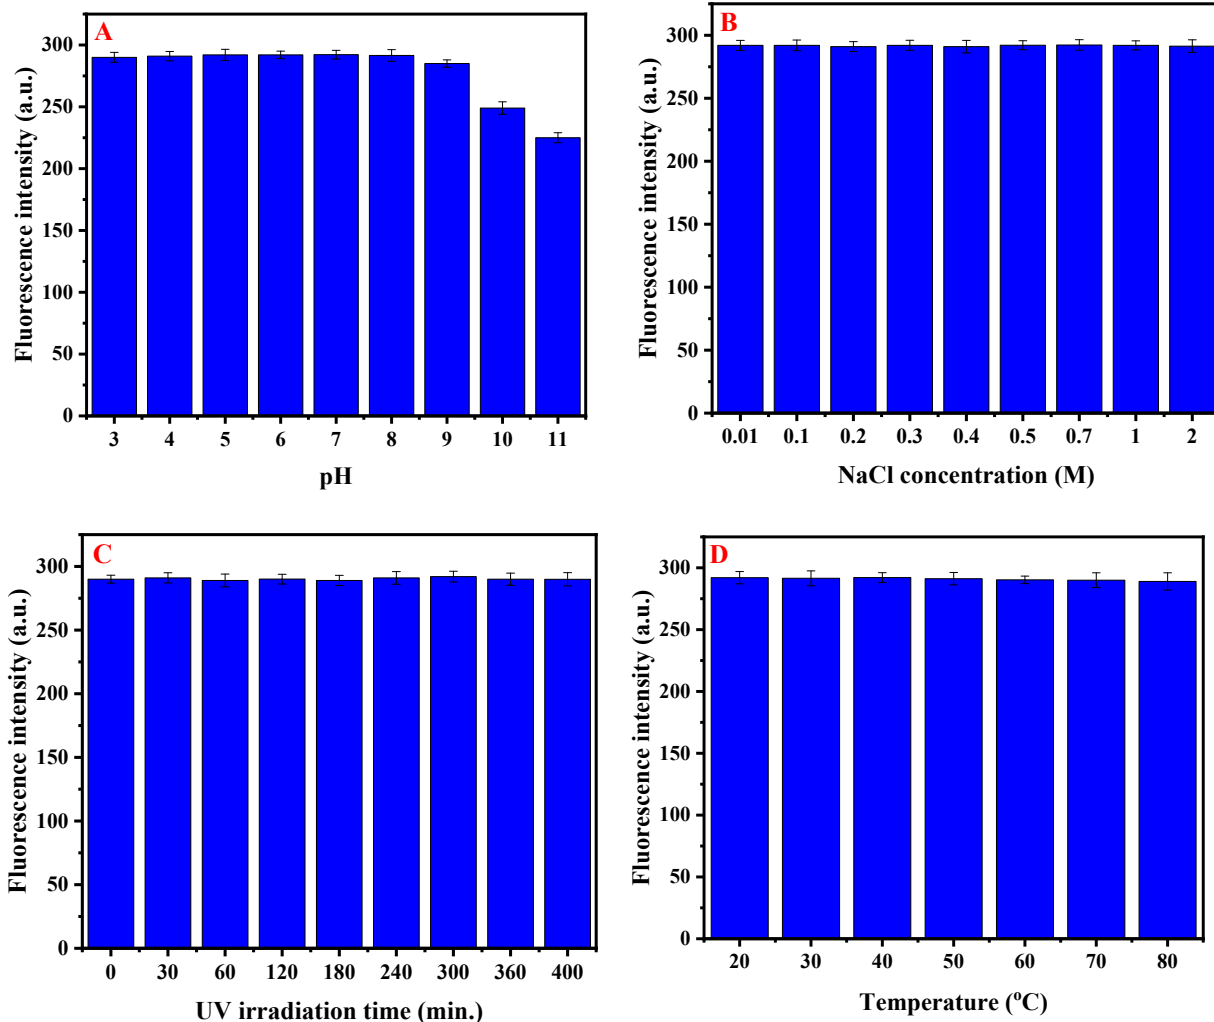

**Fig. S1.** Stability of the fluorescence response of the prepared TA-CDs under various conditions: (A) effect of pH (3–11), (B) effect of NaCl concentration (0.01–2.0 M), (C) effect of UV irradiation time (0–400.0 min.) and (D) effect of different temperatures (20 – 80 °C).

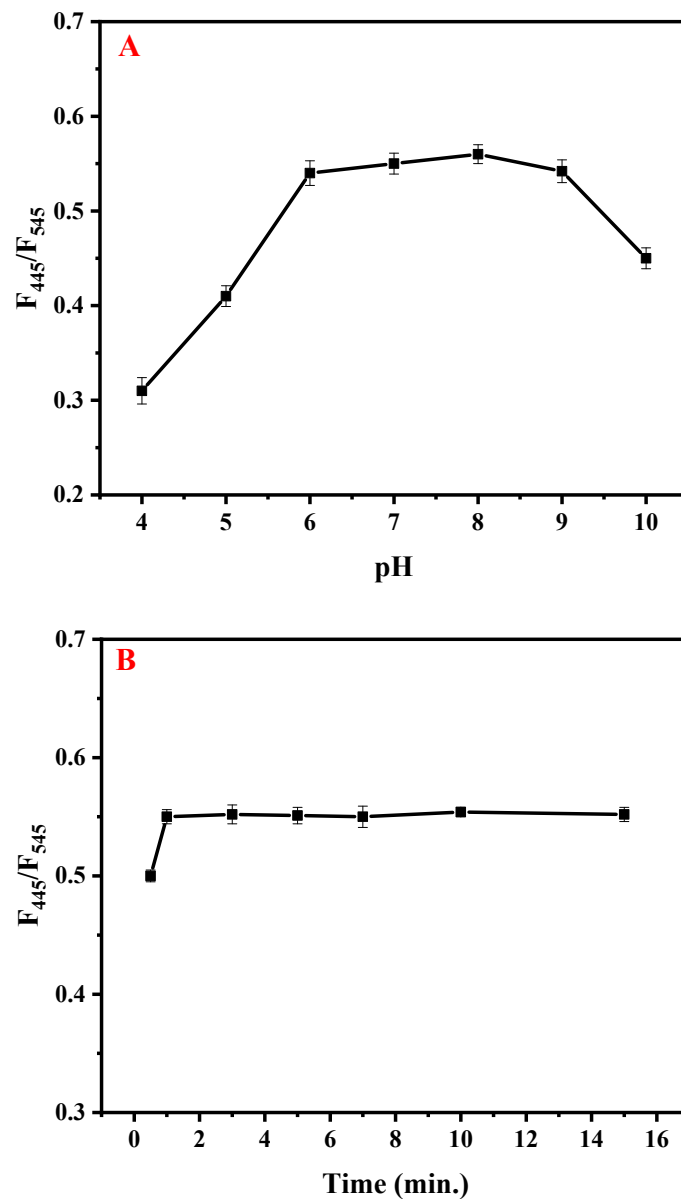

**Fig. S2.** (A) The effect of pH (4.0 to 10.0), (B) different reaction time (0.5 to 15.0 min.) on  $F_{445}/F_{545}$  of TA-CDs after addition of paraquat.

**Table S1:** Comparison of the reported methods for paraquat detection with proposed method.

| Probe                                    | Linearity range<br>( $\mu\text{M}$ ) | LOD<br>(nM) | Matrix                                                      | Ref.             |
|------------------------------------------|--------------------------------------|-------------|-------------------------------------------------------------|------------------|
| BPNSs                                    | 0.0039 – 389                         | 0.70        | Green tea, black tea,<br>and matcha powder                  | 1                |
| Squaraines                               | 0.017 – 0.15                         | 372         | Chinese cabbage                                             | 2                |
| Polymeric probe                          | 0 – 6,000                            | 11,000      | Water sources, soil,<br>apples, and lettuce                 | 3                |
| Pyranine                                 | 1.0 – 20.0                           | 200         | Tap water                                                   | 4                |
| CdS QDs                                  | 0.1–5.8                              | 38.9        | Environmental and<br>agricultural                           | 5                |
| TGA CdTe/CdS<br>NCs                      | 0.01 – 0.1                           | 3.5         | Natural water                                               | 6                |
| GSH/ $\beta$ -CDs-<br>AuNCs              | 0.019–0.389                          | 4.7         | Chinese cabbage                                             | 7                |
| Calix[6]arene                            | 0.0039–0.070                         | 0.12        | Drinking water                                              | 8                |
| Q[7]@PAL<br>sensor                       | 0–12.0                               | 340         | .....                                                       | 9                |
| Cucurbit[8]uril                          | 0.00024 – 250                        | 0.24        | .....                                                       | 10               |
| [Fluo][P <sub>66614</sub> ] <sub>2</sub> | 0.3–7.0                              | 64.0        | Vegetables and<br>environmental<br>samples                  | 11               |
| SiO <sub>2</sub> @CdTe<br>QDs@MIP        | 0.0389 – 3.89                        | 1.94        | Water and corn                                              | 12               |
| N-<br>CQDs@CuNCs                         | 5 – 100                              | 3.03        | .....                                                       | 13               |
| G/R–AuNCs                                | 19–1935                              | 6.5         | Agricultural products,<br>local lake water and<br>tap water | 14               |
| Eosin/TA-CDs                             | 0.005 – 0.15                         | 2.11        | Water and cabbage                                           | <b>This work</b> |

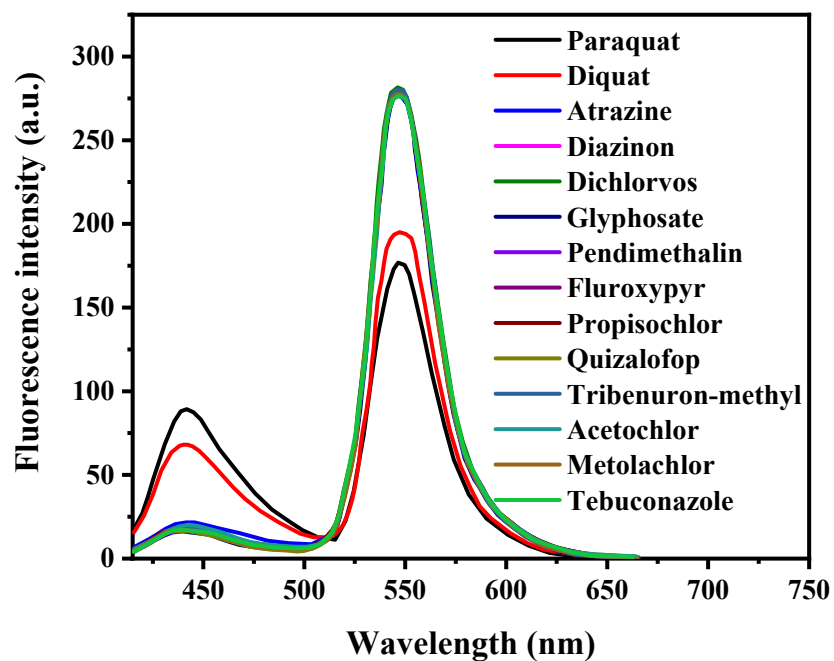

**Fig. S3.** Fluorescence spectra of the eosin/TA-CDs system upon addition of various herbicides.

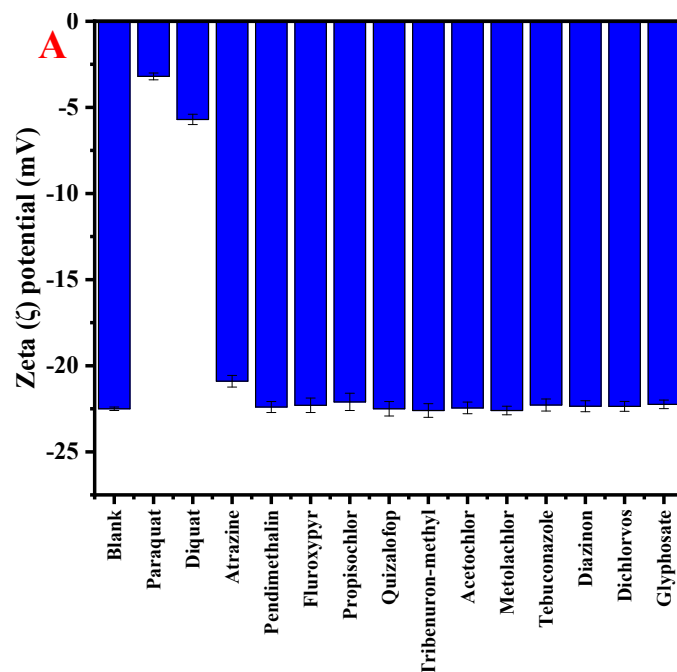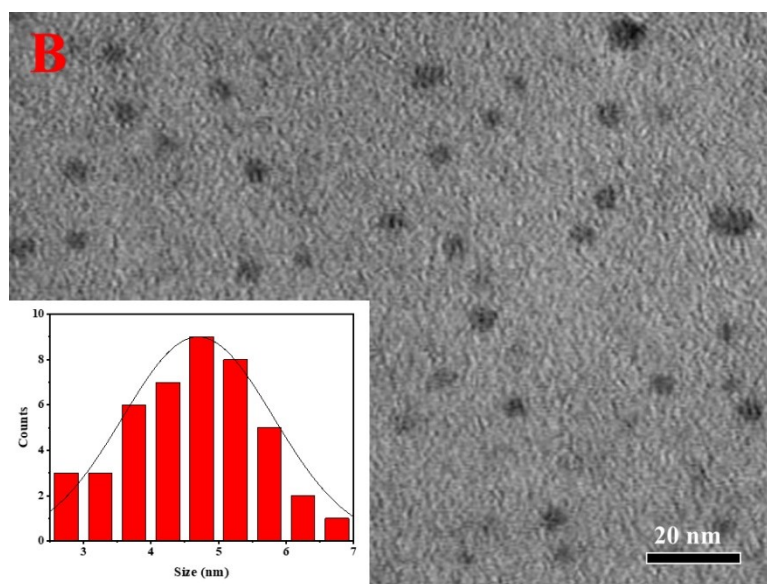

**Fig. S4.** (A) Fluorescence spectra of the eosin/TA-CDs system upon addition of various herbicides, (B) TEM image of the eosin/TA-CDs system upon addition of diazinon.



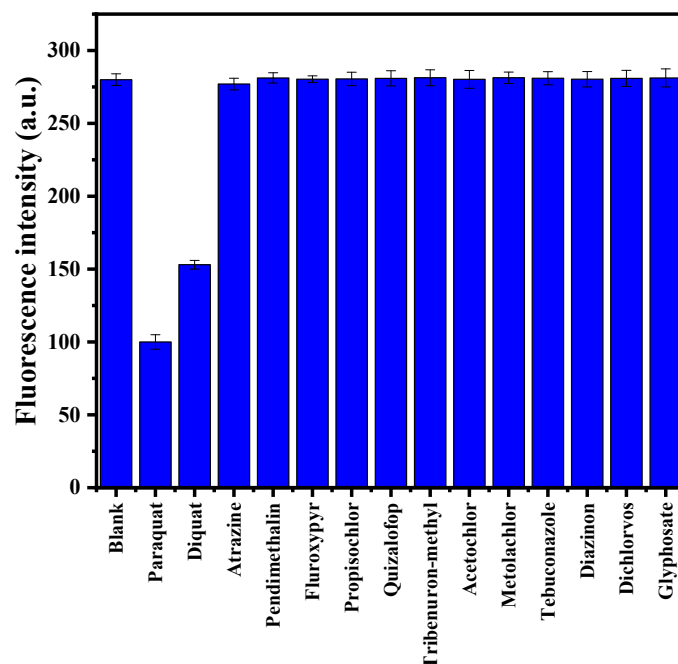

**Fig. S5.** Fluorescence spectra of the eosin upon addition of various herbicides.

## References

1. L. Wang, S. A. Haruna, W. Ahmad, J. Wu, Q. Chen and Q. Ouyang, *Food Chemistry*, 2022, **388**, 132950.
2. J. Tu, L. Xiao, Y. Jiang, Q. He, S. Sun and Y. Xu, *Sensors and Actuators B: Chemical*, 2015, **215**, 382-387.
3. N. F. Suhendra and H.-i. Lee, *Journal of Hazardous Materials*, 2025, **494**, 138513.
4. Z. Zhao, F. Zhang and Z. Zhang, *Spectrochimica Acta Part A: Molecular and Biomolecular Spectroscopy*, 2018, **199**, 96-101.
5. H. Li, J. Liu and X. Yang, *Analytical Sciences*, 2015, **31**, 1011-1017.
6. Z. Pourghobadi, H. Makanali and H. Zare, *Journal of Fluorescence*, 2021, **31**, 559-567.

7. H.-X. Ren, M.-X. Mao, M. Li, C.-Z. Zhang, C.-F. Peng, J.-G. Xu and X.-L. Wei, *Foods*, 2021, **10**, 1178.
8. E. Vasca, F. Siano and T. Caruso, *Sensors*, 2023, **23**, 1120.
9. P.-H. Shan, D.-W. Pan, C.-R. Li, T.-H. Meng, C. Redshaw, Z. Tao and X. Xiao, *Journal of Pesticide Science*, 2024, **49**, 114-121.
10. S. Sun, F. Li, F. Liu, J. Wang and X. Peng, *Scientific Reports*, 2014, **4**, 3570.
11. S. Che, X. Peng, Y. Zhuge, X. Chen, C. Zhou, H. Fu and Y. She, *Journal of Agricultural and Food Chemistry*, 2022, **70**, 15390-15400.
12. J. Sun, C. Chen, Y. Zhang and X. Sun, *Luminescence*, 2021, **36**, 345-352.
13. L. Chen, J. Lu, M. Luo, H. Yu, X. Chen, J. Deng, X. Hou, E. Hao, J. Wei and P. Li, *Food Chemistry*, 2022, **379**, 132139.
14. S. Gong, L. Ma, F. Nie, M. Luo, S. Wu, T. Wang, Y. Yang, D. Chen, J. Wei and P. Li, *Talanta*, 2025, **286**, 127429.
